## Title Page:

Estimates of Undernutrition among migrant/refugee children in lower-middle-income countries: A meta-analysis of published evidence from 2010-2022

## Contributor details:

### 1. 1<sup>st</sup> Contributor\*\*

Dr. Rounik Talukdar (RT), MPH  
Independent Consultant  
Phone Number: 9831458673  
Email: talukdar.rounik1@gmail.com

### 2. 2<sup>nd</sup> Contributor#

Mr. Vivek Kumar (VK), MPH  
Independent Consultant,  
Email ID: vivekkumar773925@gmail.com

### 3. 3<sup>rd</sup> Contributor

Dr. Diplina Barman (DB), MDS  
Project Senior Research Fellow  
ICMR-National Institute of Cholera and Enteric Diseases, Kolkata, India  
Phone Number: 08895241468  
Email ID: diplina93@yahoo.co.in

### \*Corresponding Author/s

Dr. Rounik Talukdar (RT), MPH  
Independent Consultant  
**Phone Number:** (+91) 9831458673  
**Email:** talukdar.rounik1@gmail.com

# Contributor 1 & 2 has contributed equally.

**Title:** Estimates of Undernutrition among migrant/refugee children in lower-middle-income countries: A meta-analysis of published evidence from 2010-2022

**Abstract:**

**Background**

The purpose of this study was to highlight the state of undernutrition among migrant/refugee children living in lower-middle-income countries using published evidence from the past twelve years (2010 – 2022).

**Methods**

We searched PubMed, Scopus, Science-Direct, CINAHL-Plus, & Google-Scholar to identify peer reviewed evidence relevant to our objective published between January 2010 to December 2022. Two researchers independently examined the studies, retrieved the data, and evaluated the studies' quality. NIH quality assessment tool was used. A random effect meta-analysis was conducted to pull the estimates. Subgroup analysis, Meta regression and sensitivity analysis was done to explore the source of heterogeneity and the robustness of our estimates.

**Findings**

From selected 17 studies out of 1664 identified records, the pulled estimates of stunting, wasting and underweight among migrant/ refugee children in LMICs was 27.45% (Confidence Interval (CI) 18.99-36.82;  $I^2$ -100%; p-value <0.001), 13.59% (CI 8.48–19.67;  $I^2$ -99%; P-value <0.001), and 25.96 (CI 17.20–35.83;  $I^2$ -100%; p-value <0.001) respectively. Among different WHO regions all three undernutrition estimates were higher in LMICs belonging to South-east Asian region (Stunting 36.64%; wasting 13.98%, underweight 31.79%). Estimates in India was 43.55%, 18.71%, and 37.45% respectively in similar chronology. High heterogeneity was noted across all the estimates with  $I^2$ -value >90%. Sensitivity analysis across indicators shown stability of our estimates.

**Interpretations**

The extent of undernutrition, particularly wasting, was significant among migrant/refugee children living in LMICs. Measures should be taken to strengthen the government-subsidized public food distribution system, increase the healthcare outreach, and ensure public health-insurance coverage among the migrant population.

**Keywords**

Undernutrition; malnutrition; lower-middle-income; migrant; refugee; children; meta-analysis

## Introduction

“Give me your tired, your poor, your huddled masses yearning to breathe free...”

-- Emma Lazarus

The American author, activist and one of the greatest advocates for disenfranchised migrants engraved the essence of inclusivity for the often-ghosted migrants in her writing. Her poem is about the plight of migrants who arrived in the United States in the early 1980s. Though this review focuses on migrant and/ or refugee children in lower-middle-income countries around the world, integration of migrant health under universal health coverage remains a central tenet of holistic societal improvement.<sup>1,2</sup> Furthermore, more than ever, if we look at the COVID-19 pandemic or any future health crisis through a migrant's lens, it will become clear that for a holistic improvement, it is necessary to improve a migrant's overall health, nutritional status, and other health determinants, including employment. All of this can only be accomplished through generation of quality evidence followed by translation into actionable, plausible policy outcomes. Mankind have been on the move since the beginnings of time, sometimes to seek better jobs, better living conditions, and sometimes to avoid disasters or conflicts. According to the United Nations' Global Migration Report 2022, the number of global migrants stands at a staggering 89.4 million in 2020, with the majority of migrants residing in low- and middle-income countries (LMICs).<sup>3,4</sup> Not just international cross-border migration, but more than 12% of the global population has been living outside their own area, with the greatest internal movement observed in LMICs, particularly within India and China.<sup>5</sup> Migrants frequently encounter challenges such as a lack or restricted access to basic essentials such as food, clean water, clothing, and a place to live as a result of intra- and inter-country mobility. These issues can have an influence on the physical and emotional health of migrants of all ages, particularly those under the age of five. Evidences suggest that nutritional deficiencies and infectious diseases are the most common illnesses afflicting these children.<sup>6-9</sup> Childhood malnutrition has been a well-documented public health emergency globally with 149.2 million under 5 children being stunted in 2020, and 45.4 million being wasted<sup>10-12</sup>. To tackle and improve the conditions of poverty, hunger and build an improved society, the Sustainable Development Goals (SDG) target 2.2 envisages “end all forms of malnutrition by 2030”. Although there is a decline in the incidence of under-nutrition from 24.4% in 2015 to 22% in 2020; to achieve the target of 5% reduction in the stunting incidence,

the current annual decline rate should double from 2.1% to 3.9%.<sup>13,14</sup> Though policies and vertical programs targeting the children have been in place since decades now. Unfortunately, the migrant populations are seldom ghosted from these benefits increasing their vulnerability towards developing diseases. In particular, the socio-economic, cultural and developmental consequences of movement take a major toll on migrant/ refugee children's nutritional status.<sup>11</sup> Thereby, this study aimed to highlight the pooled estimates of select under-nutrition indicators (stunting, wasting and underweight) among migrant/ refugee children in LMICs through Curation of published evidences from past twelve years. Further we presented a stratified analysis of estimates in different WHO regions including South-east Asia (SEAR), Eastern Mediterranean (EMR), Western Pacific (WPR) and African Regions (AFR).

## **Materials & Method**

This meta-analysis adheres to the PRISMA and "Meta-analyses Of Observational Studies in Epidemiology" (MOOSE) guidelines, of which the latter is regarded as preferred reporting format in meta-analysis of observational studies over traditional PRISMA.<sup>15,16</sup> We registered the protocol prior to analysis of the data at Open Science Framework, which can be accessed through the web URL [doi.org/10.17605/OSF.IO/XTRUD](https://doi.org/10.17605/OSF.IO/XTRUD). Any deviations from the original registration, has been updated in the portal and has been described in the **Supplementary Appendix: Suppl. 1A** provided along with this article. Both PRISMA & MOOSE checklist has been provided as **Supplementary material 2 & 3**.

## **Outcome**

The main outcome of this review is to calculate the pulled estimates of different constructs of undernutrition among migrant/ refugee children in LMICs. The double burden of malnutrition chiefly encapsulated the both extremes; undernutrition and overweight, obesity.<sup>17</sup> Undernutrition on the other hand revolves around four broad categories based on anthropometric body measures; stunting, wasting, underweight and deficiency of micronutrients.<sup>18</sup> In this review we specifically emphasized on prevalence of children being stunted, wasted, and underweight among the population of migrant/ refugee children in lower-middle-income countries (LMICs). Children with stunting, wasting, or underweight were classified as having a height-for-age Z score for each of the indicators that was less than

2 standard deviations below the WHO Child growth standards median for the corresponding indicators.<sup>18,19</sup>

### ***Evidence Curation***

A systematic search was made amongst four digital databases including: Pub Med, Scopus, Science Direct, CINAHL Plus, & Google Scholar on January 31, 2023, to curate evidence published relevant to our objective between January 2010 to December 2022. We did not limit our search depending on the age of the participants in individual studies. Rather, after filtering evidence, we narrowed our inclusion criteria to correspond with our objective of generating estimates of selected under-nutrition indicators among migrant/ refugee children in LMICs. To limit the search appearances particularly in google scholar we sorted the identified studies based on relevance, which is an inherent capability of the search engine, further we screened the first twenty webpages (20\*10 = 200 studies) for relevant articles. Our search string was comprised of MeSH terms, MeSH major topics, and other relevant indexed terms, keywords. The central theme of the search was: (malnutrition OR nutritional OR nutrition OR undernutrition OR stunt\* OR wasting OR Underweight) AND (migrants OR migration OR immigrants OR transients OR refugees OR labourer OR workers) AND (lmic OR “lower middle income”). The search strings were manually translated to match the search styles of different databases. The complete search string used for Pub Med has been provided in the **supplementary appendix: Suppl. 1B**.

### ***Selection Criteria***

While formulating inclusion criteria we used the **CoCoPop** approach that has been cited as a preferable method in systematic review and metanalysis of prevalence/proportions.<sup>20,21</sup> The framework was described as: **Condition** (Prevalence of select undernutrition indicators), **Context** (LMICs), and **Population** (migrant / refugee children or left behind children of migrant parents).

Studies adhering to following criteria were considered: 1. Published peer-reviewed observational studies (cross-sectional original or secondary data analysis, cohort studies or case-control); Unpublished or grey literatures were not included assuming insufficiency and quality concerns in reporting of the data. 2. Enrolled migrant/refugee children or children of migrant parents who were left behind in LMICs. (The age range set was participants under the

age of 17 years; the justification for limiting the age range below 17 years fits with changes in child development milestones<sup>22</sup>). 3. Have measured frequency of either all three or at-least one of the select undernutrition indicators i.e., stunting/ wasting/ underweight; and 4. Studies written in English language with full text availability.

### ***Study selection***

Studies gathered from different databases were imported to Zotero version 6.0.2.0 to identify and remove duplicates. Subsequently, title and abstract screening were carried out to identify relevant articles. Further identified papers were subjected to full text screening to determine eligibility based on our criteria, and suitable articles were subsequently retained. Two independent reviewers, RT and VK, undertook the screening procedure, and further consensus was sought and discussed among them in the presence of another reviewer, DB.

### ***Data extraction***

A data extraction format was created in online Google docs' platform. Data extraction was carried out by one independent reviewer VK, and was further dynamically reviewed in real time by another reviewer RT. The extraction template contained the following fields: 1. First author details and publication year; 2. Country and Corresponding WHO region; 4. Study design & population; 5. Participants' age range; 6. Sample size; 7. Prevalence of select undernutrition indicators; 8. Other major findings.

### ***Quality assessment***

We used the NIH Quality Assessment Tool to assess the quality of the selected full texts in this review.<sup>23</sup> The tool includes 14 questions that assess external and internal validity in terms of methodological rigor and study quality. Each question with a satisfactory answer was given a score of one, otherwise zero. Questions that were not relevant to the research included in this review were marked as not applicable, and their marks were not accounted in the scores. To ensure uniformity between studies, the scores were transformed into relative frequencies. A score of 70% or higher was regarded "Good," while 40-69% and < 40% were labeled "fair" and "poor," respectively.<sup>11</sup> Two reviewers DB, and VK assessed the quality of studies independently which was further discussed in consensus with RT for resolving any

disagreement. The complete NIH assessment tool can be found on the [nhlbi.nih.gov](https://nhlbi.nih.gov) website.<sup>23</sup>

### **Data synthesis & Analysis**

R Studio (version 4.1.3, 2022; The R Foundation for Statistical Computing, Vienna, Austria) was used to carry out the meta-analysis.<sup>24</sup> We used the 'metaprop' (Rdocumentation.org) command package developed for metanalysis of single proportions.<sup>25</sup> Freeman-Tukey double arcsine proportional transformation to stabilize the variance of proportions across included studies was used. The application of transformation further enables the binomial distribution to be used to model the within-study variability.<sup>26-28</sup> The standard error (SE) of the proportions of each select indicator of undernutrition was calculated using extracted data. The formula used was: " $SE = \sqrt{P \times (1-P) / n}$ , P = proportions, n = population size". A random effect inverse variance method was used to pull proportions, which involves calculating a weighted average using SEs and feeding it to the data frame for the "metaprop" package in R Studio.<sup>25</sup> We used random effect model because of the considerable amount of between study heterogeneity in terms of enrolled population, study settings, and methodology which was objectively assessed during the selection and finalization of the studies. The pooled estimate was presented as a percentage with a 95% confidence interval, and forest plots were prepared for graphical display. In order to measure heterogeneity,  $I^2$  statistics were used ( $I^2$  statistics: 25% - mild, 25-75% - moderate, and > 75% - high).<sup>29</sup> Further subgroup analysis followed by univariate meta-regression analysis was performed based on the WHO regions to account for geographic variability. We also used leave-one-out analysis to assess the sensitivity of our overall estimates. This removes one study at a time and calculates the effect estimate, further collating the findings in a forest plot. This enables us to see the variation in pooled estimates as well as the stability.<sup>30</sup> Publication bias was visually analyzed by constructing a funnel plot, and asymmetry of the plot was examined through Egger's test, where P value of  $\leq 0.05$  was deemed as statistically significant. We used  $1/\sqrt{\text{Study size}}$  as a measure of accuracy in the y-axis against arcsine transformed proportion in x-axis for constructing the funnel plot.<sup>31,32</sup> The rationale behind choosing such measure is well documented in literature. Hunter et al. 2014 has described that using conventional measures in proportional meta-analysis may be misleading in detecting the publication bias due to inherent correlation between study outcome and precision measures.<sup>31</sup>



## Results

A total of 17 studies were included in this meta-analysis from 1664 identified through the five databases. The complete study screening and selection flowchart has been given in **Figure 1**.

[Figure 1 about here]

### *Characteristics of the studies selected*

Eleven of the selected 17 studies were from the WHO South East Asia Region (SEAR), two from the African and Western Pacific regions each, and three from the Eastern Mediterranean region. The median sample size of the included studies was 438.5, and interquartile range between 227.75 (Quartile 1) – 1754 (Quartile 3). Eleven studies included participants under the age of five, while three studies had participants under the age of three. Further, three studies with individuals between the ages of 5 and 17 years old were found. Data on Stunting among migrant/ refugee children in LMICs was available in 17 studies, whereas similar data for wasting and underweight were available in 12 & 13 out of 17 included studies respectively. The study by Graham et al. 2013<sup>33</sup>, reported stunting prevalence among migrant left behind children in two subset population in Philippines & Vietnam. Thereby effectively we had 18 studies which reported stunting. There were 7, 5 & 6 studies from India respectively, which reported estimates on stunting, wasting and underweight among our target population. The complete description of studies with population, study setting has been depicted in **Table 1**.

### **Quality Assessment:**

Quality assessment was done based on tools provided by NIH. One study was deemed as “fair” with an assessment score of 62.5, rest of all the sixteen studies was assessed as “Good” with quality score more than 70%. **[Table 1]** The overall mean quality score was 88.97 with standard deviation of 10.4. The complete quality assessment has been provided in **Supplementary Appendix: Suppl.figure 2**.

### *Pulled estimates of Select Underweight Indicators*

The pulled estimate of stunting, wasting and underweight among the target population in LMICs was 27.45% (Confidence Interval (CI) 18.99 - 36.82;  $I^2$  100%; p value <0.001), 13.59% (CI 8.48 – 19.67;  $I^2$  99%; P value < 0.001), and 25.96 (CI 17.20 – 35.83;  $I^2$  100%; p value <0.001) **[Figure 2, 3 & 4]**. We also assessed the pulled estimates of stunting, wasting and underweight



among the target population in India, which were 43.55% (CI 29.53 – 58.12;  $I^2$  100%; p value <0.001), 18.71% (CI 11.42 – 27.31;  $I^2$  98%; p value <0.01), and 37.45% (CI 24.32 – 51.61;  $I^2$  100%; p value <0.001) respectively [refer to **Supplementary Appendix: Suppl.figure 2A**]. High levels of statistical heterogeneity were reported throughout all the estimates.

### ***WHO region wise stratified Analysis & Meta-regression***

We conducted subgroup analysis based on the studies belonging to regions demarcated by WHO. South East Asian Region (SEAR) recorded the highest estimates for all the select undernutrition indicators (Stunting 36.64%; wasting 13.98% and underweight 31.79%) [Figure 2, 3 & 4]. Result of subgroup analysis & the meta-regression has been depicted in **Table 2**. Test for subgroup differences was significant for all the select undernutrition indicators with p values of significance <0.01. We conducted univariate meta-regression analysis to understand the effect of WHO zones on the heterogeneity. Significant effect was found for stunting, wasting and underweight with p values 0.02, 0.01, 0.01 respectively. WHO Zones or geographic variability between studies could explain 26.88, 36.36, 35.36% ( $R^2$  values) heterogeneity for stunting, wasting and underweight indicators respectively.

Though our subgroup analysis and univariate meta regression accounting effect of geographic variability on effect estimates, were statistically significant but it is to be interpreted with caution.<sup>34</sup> After conduction of subgroup analysis though test of subgroup difference was significant for all indicators but significant residual heterogeneity could be noted among each subgroup across all indicators [Table 2]. This may be attributed to the inherent heterogeneity of studies in terms of study design, participants, and non-uniform distribution of studies across each WHO/ geographic zone.

[Figure 2,3 & 4 about here]

### ***Sensitivity Analysis***

We performed a leave-one-out analysis to assess the robustness of the pulled estimates of different select undernutrition indicators. The analysis revealed that no single study had any substantial influence on the findings across the three indicators. For stunting the pulled estimates in leave-one-out analysis ranged from 25.32% to 29.02% (our estimate 27.45%), for wasting the range was 12.07 – 15.11% (our estimate 13.59%), and for underweight the range

was 23.88 – 28.66 (our estimate 25.96%). [Refer to Supplementary Appendix: Suppl.figure 2B]

### ***Publication Bias***

Visually funnel plots for all three undernutrition indicators among target population in LMICs revealed no asymmetry and was further confirmed with egggers p value for stunting, wasting & underweight being non-significant 0.20, 0.47, 0.91 respectively. [Refer to Supplementary Appendix: Suppl.figure 2C]

### **Discussion**

The present meta-analysis highlights the under-nutrition status measured in terms of stunting (low height-for-age), underweight (low weight-for-age) and wasting (low weight-for-height) among the migrant/refugee children belonging to LMICs. The pooled proportions were calculated using data belonging to LMICs from 2011 through 2022 with a special report on similar estimates from India.

The 2020 global estimates showed a total of 36 million migrant/refugee children.<sup>35</sup> Scattered reports on the prevalence of under nutrition among these children ranged from 20% to 30% stunting, 17% to 32% wasting and underweight varying from 25% to 45%. The pooled estimated from this study also reports similar findings with stunting at 27.45%, wasting at 25.96% and underweight at 25.96%.<sup>36-40</sup> Our estimates (Stunting 27.45, Wasting 13.59, underweight 25.96%) fared well against these findings.

UNICEF/ WHO/ World Bank joint malnutrition estimates 2021 (JME) presented the most comprehensive analysis on global malnutrition among all children to date. They estimated the prevalence of stunting and wasting in LMICs to be 29.1% and 9.9%, respectively, in 2020.<sup>12</sup> Our estimates of the pulled prevalence of stunting among migrant children in LMICs (27.45% with an upper limit of 36.82%) were comparable to the JME estimates. In comparison to JME, there was a significant increase in wasting (9.9% vs. 13.59 in our review). Similar findings were found in a meta-analysis of Demographic and Health Survey data from LMICs conducted by Akombi et al. 2019. Though their report on stunting was comparable to our estimate (29% in overall children vs. 27.45% in migrant children in our review), the prevalence of wasting

among migrant children in our review (13.59%) was higher than the overall 7.5% reported in Akombi's analysis among children in LMICs.<sup>10</sup> Wasting is mainly driven by inadequate dietary intake and diseases like diarrhea and respiratory infections. All of these contributing factors are reportedly highly prevalent among the migrant and refugee population.<sup>41</sup> Our estimates of stunting in the SEAR region (36.64%) were comparable to JME estimates in the SEAR (27.4%).<sup>12,14</sup> Further, UNICEF/ WHO/ World bank joint report states that prevalence of wasting in SEAR regions were around 8.2%. Our wasting estimate among migrant / refugee children in LMIC countries belonging to the region were around 13.98%. This increase is because migrant communities especially in LMICs takes an increased burnt of infectious diseases complicated by poor living conditions and mobility.<sup>12</sup>

We also presented select estimates of undernutrition in India. According to the National Family Health Survey - 5 (NFHS - 5), the prevalence of Stunting, Wasting, and Underweight among children aged < 5 years is 35.5, 19.3, and 32.1%, respectively.<sup>42,43</sup> Similar estimates were found in our review for stunting, Wasting, and underweight among migrant/refugee children in India as 43.55, 18.71, and 37.45%, respectively. It is also worth noting that, while India and several other countries are on track to reduce stunting estimates by 50% among children by 2021, wasting outcomes have worsened with no improvement in many low and low-income countries, including India. This is extremely crucial for migrant/refugee children, for whom our review estimates are already considerably higher than JME estimates overall and across regions.<sup>12,44</sup>

In 2006, UNICEF affirmed several causes of childhood malnutrition, including dietary inconsistencies such as insufficient dietary quantity, lack of precise dietary micronutrient and protein values, increased frequency of microbial infections, improper breast-feeding processes and frequencies, as well as societal issues such as food taboos and the accessibility of hygienic food. The nutritional status of infants and children has been shown to be significantly impacted by maternal nutrition.<sup>36,45,46</sup> The maternal knowledge about the age-appropriate nutritional intake and feeding practices has been a prominent marker for childhood under nutrition.<sup>47,48</sup> These difficulties are significantly worse for the already vulnerable migrant/ refugee population. Migration after childbirth impacts the children's immunization status, making them more susceptible to developing various types of diseases, which affects their nutritional levels, while migration during pregnancy affects the

accessibility to regular health checkups. Further reports suggest that mothers' increased workloads have made it harder for them to spend enough time with their kids, thereby negatively impacting on how much food they can eat and how much nutrition they need to grow anthropometrically.<sup>45,49–52</sup>

Literature reports by several authors have shown a seasonal variability among the under nutritional status of the child population.<sup>53</sup> Wasting has been reported to be more prevalent during the monsoon season because of an increased incidence of infectious diseases including diarrheal outbreaks and the lack of availability of previously harvested food.<sup>41,54–56</sup> The availability of sanitation and hygiene practices of the migrants also contributed to the development of different vector borne diseases occurring during the summer and monsoon months. Roshania et al<sup>36</sup> in her study reported reduced age-related intake of food during the summer months owing to the reduced availability and increased food prices during these months thereby increasing the incidences of stunting and wasting. Weight of the growing children is affected by small-term food intake fluctuations leading to an increased wasting incidence during these months.

### ***Strength & Limitations***

The novelty of the present study lies in being a first comprehensive report exploring the under nutritional status of the migrant/ refugee children residing in the LMICs. It is important to increase the evidence base for these vulnerable population groups through conduction of national level surveys alongside interventional studies to enhance their nutritional statuses. This meta-analysis was limited to reporting the pooled estimate of undernutrition in migrant/ refugee children and could not investigate how growth trajectories changed over the course of a migration event or how seasonal variations in factors affecting nutrition status, such as illness and food security, affected growth trajectories. As a holistic public health issue, aggressive efforts to improve nutritional conditions are required.

### ***Conclusion***

This meta-analysis provides a comprehensive assessment of undernutrition among migrant/refugee children in lower-middle-income countries (LMICs) based on evidence from 2010 to 2022. The findings reveal concerning rates of stunting (27.45%), wasting (13.59%), and underweight (25.96%). These statistics align with global estimates, shedding light on the

significant public health challenges faced by these children. Regionally, the South East Asia Region (SEAR) exhibits the highest prevalence of undernutrition indicators, emphasizing the need for targeted interventions in this area.

Addressing undernutrition requires a comprehensive approach involving healthcare providers, policymakers, and communities. Interventions should prioritize improving access to nutritious food, promoting appropriate feeding practices, enhancing healthcare services, and addressing social determinants of health. Targeted efforts are particularly essential in LMICs, where undernutrition rates are already high.

In conclusion, this review emphasizes the pressing need for effective interventions and policies to mitigate undernutrition among migrant/refugee children in LMICs. By understanding the prevalence and underlying factors, we can develop targeted strategies to promote the health and well-being of this vulnerable population.

#### **Funding**

None

#### **Conflict of Interest**

None

#### **Author Contributions**

All authors made substantial contributions to this study and approved the final version of the manuscript prior to submission.

RT- Conceptualization, Data curation, Analysis, Interpretation, Validation, Writing manuscript (Original draft and review), Project administration, Supervision; VK- Conceptualization, Data curation, Writing manuscript (Original draft and review); DB- Data curation, Interpretation, Validation, writing manuscript (Review and Editing), Supervision.

#### **Data availability statement**

The data that support the findings of this study are included in the manuscript, any additional specific data will be made available by the corresponding author through mail communication.

## References

1. Lyden J. Emma Lazarus, Poet of the Huddled Masses. NPR [Internet]. 2006 Oct 21 [cited 2023 Feb 15]; Available from: <https://www.npr.org/2006/10/21/6359435/emma-lazarus-poet-of-the-huddled-masses>
2. Poetry Foundation. The New Colossus by Emma Lazarus [Internet]. Poetry Foundation. Poetry Foundation; 2023 [cited 2023 Feb 19]. Available from: <https://www.poetryfoundation.org/poems/46550/the-new-colossus>
3. McAuliffe M, Triandafyllidou A. World Migration Report 2022. International Organization for Migration (IOM), Geneva; 2022 p. 18–540.
4. United Nations Department of Economic and Social Affairs, Population Division (2020). International Migration 2020 Highlights (ST/ESA/SER.A/452) [Internet]. 2020 [cited 2023 Feb 20] p. 0–60. Available from: <https://www.un.org/development/desa/pd/news/international-migration-2020>
5. GEM Report Team. Global education monitoring report, 2019: Migration, displacement and education: building bridges, not walls [Internet]. 2nd ed. UNESCO; 2018 [cited 2023 Feb 20]. 362 p. Available from: <http://bit.ly/2019gemreport>
6. Abubakar I, Aldridge RW, Devakumar D, Orcutt M, Burns R, Barreto ML, et al. The UCL–Lancet Commission on Migration and Health: the health of a world on the move. *The Lancet*. 2018 Dec 15;392(10164):2606–54.
7. World Health Organization. Refugee and migrant health [Internet]. 2022 [cited 2023 Feb 14]. Available from: <https://www.who.int/news-room/fact-sheets/detail/refugee-and-migrant-health>
8. Sweileh WM. Global output of research on the health of international migrant workers from 2000 to 2017. *Globalization and Health*. 2018 Nov 8;14(1):105.
9. Hargreaves S, Rustage K, Nellums LB, McAlpine A, Pocock N, Devakumar D, et al. Occupational health outcomes among international migrant workers: a systematic review and meta-analysis. *Lancet Glob Health*. 2019 May 20;7(7):e872–82.
10. Akombi BJ, Chitekwe S, Sahle BW, Renzaho AMN. Estimating the Double Burden of Malnutrition among 595,975 Children in 65 Low- and Middle-Income Countries: A Meta-Analysis of Demographic and Health Surveys. *Int J Environ Res Public Health*. 2019 Aug;16(16):2886.
11. Ankomah A, Byaruhanga J, Woolley E, Boamah S, Akombi-Inyang B. Double burden of malnutrition among migrants and refugees in developed countries: A mixed-methods systematic review. *PLOS ONE*. 2022 Aug 18;17(8):e0273382.
12. UNICEF / WHO / World Bank Group. Levels and trends in child malnutrition: key findings of the 2021 edition of the joint child malnutrition estimates [Internet]. New York: United Nations Children’s Fund; 2021 [cited 2023 Feb 20] p. 32. Available from: <https://www.who.int/publications/i/item/9789240025257>



13. de Onis M, Dewey KG, Borghi E, Onyango AW, Blössner M, Daelmans B, et al. The World Health Organization's global target for reducing childhood stunting by 2025: rationale and proposed actions. *Matern Child Nutr*. 2013 Sep 18;9(Suppl 2):6–26.
14. UNICEF / WHO / World Bank Group. Technical Notes from the background document for country consultations on the 2021 edition of the UNICEF-WHO-World Bank Joint Malnutrition Estimates [Internet]. 2021 [cited 2023 Feb 20] p. 1–57. Available from: <https://data.unicef.org/resources/jme-2021-country-consultations/>
15. Page MJ, McKenzie JE, Bossuyt PM, Boutron I, Hoffmann TC, Mulrow CD, et al. The PRISMA 2020 statement: an updated guideline for reporting systematic reviews. *Systematic Reviews*. 2021 Mar 29;10(1):89.
16. van Zuuren E j., Fedorowicz Z. Moose on the loose: checklist for meta-analyses of observational studies. *British Journal of Dermatology*. 2016;175(5):853–4.
17. World Health Organization. Malnutrition [Internet]. [cited 2023 Jan 31]. Available from: <https://www.who.int/health-topics/malnutrition>
18. Maleta K. Undernutrition. *Malawi Med J*. 2006 Dec;18(4):189–205.
19. Winichagoon P, Margetts BM. The double burden of malnutrition in low- and middle-income countries. In: Romieu J, Dossus L, Willett WC, editors. *Energy Balance and Obesity* [Internet]. Lyon (FR): International Agency for Research on Cancer; 2017 [cited 2023 Feb 10]. (IARC Working Group Reports). Available from: <http://www.ncbi.nlm.nih.gov/books/NBK565820/>
20. Munn Z, Stern C, Aromataris E, Lockwood C, Jordan Z. What kind of systematic review should I conduct? A proposed typology and guidance for systematic reviewers in the medical and health sciences. *BMC Med Res Methodol*. 2018 Jan 10;18:5.
21. Talukdar R, Barman D, Thakkar V, Kanungo S. Utilization of dental care services among adult Indian population: A meta-analysis of evidence from 2011–2022. *Health Promot Perspect*. 2022 Dec 31;12(4):325–35.
22. CDC. Child Development: Adolescence (15-17 years old) | CDC [Internet]. Centers for Disease Control and Prevention. 2019 [cited 2023 Feb 6]. Available from: <https://www.cdc.gov/ncbddd/childdevelopment/positiveparenting/adolescence2.html>
23. National Heart Lung and Blood Institute. Study Quality Assessment Tools | NHLBI, NIH [Internet]. 2013 [cited 2023 Feb 21]. Available from: <https://www.nhlbi.nih.gov/health-topics/study-quality-assessment-tools>
24. RStudio Team (2020). *RStudio: Integrated Development for R*. [Internet]. Boston, MA: RStudio, PBC; 2020 [cited 2023 Feb 21]. Available from: <http://www.rstudio.com/>.
25. Wang N. How to Conduct a Meta-Analysis of Proportions in R: A Comprehensive Tutorial. 2018.
26. Nyaga VN, Arbyn M, Aerts M. Metaprop: a Stata command to perform meta-analysis of binomial data. *Arch Public Health*. 2014 Nov 10;72:39.
27. Zhou Q, Li Q, Meng W, Luo Z, Chen Y. Statistical concerns for meta-analysis of rare events and small sample sizes. *The Lancet Infectious Diseases*. 2022 Aug;22(8):1111.



28. Lin L, Xu C. Arcsine-based transformations for meta-analysis of proportions: Pros, cons, and alternatives. *Health Sci Rep*. 2020 Jul 27;3(3):e178.
29. Higgins JPT, Thompson SG, Deeks JJ, Altman DG. Measuring inconsistency in meta-analyses. *BMJ*. 2003 Sep 4;327(7414):557–60.
30. Willis BH, Riley RD. Measuring the statistical validity of summary meta-analysis and meta-regression results for use in clinical practice. *Stat Med*. 2017 Sep 20;36(21):3283–301.
31. Hunter JP, Saratzis A, Sutton AJ, Boucher RH, Sayers RD, Bown MJ. In meta-analyses of proportion studies, funnel plots were found to be an inaccurate method of assessing publication bias. *Journal of Clinical Epidemiology*. 2014 Aug;67(8):897–903.
32. Sterne JA, Egger M. Funnel plots for detecting bias in meta-analysis: guidelines on choice of axis. *J Clin Epidemiol*. 2001 Oct;54(10):1046–55.
33. Graham E, Jordan LP. Does Having a Migrant Parent Reduce the Risk of Undernutrition for Children Who Stay behind in South-East Asia? *Asian and Pacific Migration Journal*. 2013 Sep;22(3):315–47.
34. Richardson M, Garner P, Donegan S. Interpretation of subgroup analyses in systematic reviews: A tutorial. *Clinical Epidemiology and Global Health*. 2019 Jun;7(2):192–8.
35. UNICEF. Child Displacement and Refugees [Internet]. UNICEF Data: Monitoring the situation of children and women. 2022 [cited 2023 Feb 21]. Available from: <https://data.unicef.org/topic/child-migration-and-displacement/displacement/>
36. Roshania RP, Giri R, Cunningham SA, Young MF, Webb-Girard A, Das A, et al. Early life migration and undernutrition among circular migrant children: An observational study in the brick kilns of Bihar, India. *J Glob Health*. 2022 Feb 5;12:04008.
37. Pernitez-Agan S, Wickramage K, Yen C, Dawson-Hahn E, Mitchell T, Zenner D. Nutritional profile of Syrian refugee children before resettlement. *Conflict and Health*. 2019 Jun 4;13(1):22.
38. Dabar D, Yadav V, Goel A, Mangal A, Prasad P, Singh M. Risk factors for undernutrition in under-five children living in a migrant populated area of South Delhi. *J Family Med Prim Care*. 2020;9(4):2022.
39. Ortega MI, Rosales C, de Zapien JG, Aranda P, Castañeda A, Saucedo S, et al. Migration, agribusiness and nutritional status of children under five in Northwest Mexico. *Int J Environ Res Public Health*. 2012 Jan;9(1):33–43.
40. Baauw A, Holthe JK van, Slattery B, Heymans M, Chinapaw M, Goudoever H van. Health needs of refugee children identified on arrival in reception countries: a systematic review and meta-analysis. *BMJ Paediatrics Open*. 2019 Sep 1;3(1):e000516.
41. Harding KL, Aguayo VM, Webb P. Factors associated with wasting among children under five years old in South Asia: Implications for action. *PLoS One*. 2018 Jul 3;13(7):e0198749.
42. Ministry of Women and Child Development G. Malnutrition among Children - India [Internet]. 2022 [cited 2023 Feb 17]. Available from: <https://pib.gov.in/pib.gov.in/Pressreleaseshare.aspx?PRID=1806601>

43. Barnagarwala T. NFHS-5 reveals a rise in malnutrition | IDR [Internet]. India Development Review. 2021 [cited 2023 Feb 21]. Available from: <https://idronline.org/article/health/nfhs-5-reveals-a-rise-in-malnutrition/>
44. Karpagam DS. NFHS 5 Has Much To Say About India's Nutrition. Who's Listening? – The Wire Science [Internet]. 2021 [cited 2023 Feb 21]. Available from: <https://science.thewire.in/health/nfhs-5-nutrition-data-underweight-stunting-bmi-nutrient-deficiencies/>
45. Hartono S, Niyonsenga T, Cochrane T, Kinfu Y. Effect of migrant parents' bodyweight perception on children's body bodyweight: A longitudinal analysis of population cohort study. *SSM - Population Health*. 2023 Mar 1;21:101318.
46. UNICEF. Poor diets damaging children's health worldwide [Internet]. 2019 [cited 2023 Feb 21]. Available from: <https://www.unicef.org/press-releases/poor-diets-damaging-childrens-health-worldwide-warns-unicef>
47. Saaka M. Relationship between Mothers' Nutritional Knowledge in Childcare Practices and the Growth of Children Living in Impoverished Rural Communities. *J Health Popul Nutr*. 2014 Jun;32(2):237–48.
48. Rakotomanana H, Hildebrand D, Gates GE, Thomas DG, Fawbush F, Stoecker BJ. Maternal Knowledge, Attitudes, and Practices of Complementary Feeding and Child Undernutrition in the Vakinankaratra Region of Madagascar: A Mixed-Methods Study. *Curr Dev Nutr*. 2020 Oct 20;4(11):nzaa162.
49. Schwarzwald H. Illnesses among recently immigrated children. *Semin Pediatr Infect Dis*. 2005 Apr;16(2):78–83.
50. Kebede A, Getaneh D, Asfaw D, Birhanu A. Determinants of Under-nutrition among Children Aged 6 up to 59 Months in Akaki Kaliti Sub City, Addis Ababa: Unmatched Case-Control Study [Internet]. medRxiv; 2023 [cited 2023 Feb 21]. p. 2023.01.25.23285000. Available from: <https://www.medrxiv.org/content/10.1101/2023.01.25.23285000v1>
51. Harris E. Plan Calls for Global Collaboration to Address Child Undernutrition. *JAMA*. 2023 Feb 14;329(6):457.
52. Wang MS, Lin CH. Barriers to Health and Social Services for Unaccounted-For Female Migrant Workers and Their Undocumented Children with Precarious Status in Taiwan: An Exploratory Study of Stakeholder Perspectives. *International Journal of Environmental Research and Public Health*. 2023 Jan;20(2):956.
53. Egata G, Berhane Y, Worku A. Seasonal variation in the prevalence of acute undernutrition among children under five years of age in east rural Ethiopia: a longitudinal study. *BMC Public Health*. 2013 Sep 18;13:864.
54. Dwivedi LK, Bhatia M, Bansal A, Mishra R, P. S, Jana S, et al. Role of seasonality variation in prevalence and trend of childhood wasting in India: An empirical analysis using National Family Health Surveys, 2005–2021. *Health Science Reports*. 2023;6(2):e1093.
55. Johnston R, Dhamija G, Kapoor M, Agrawal PK, Wagt A de. Methods for assessing seasonal and annual trends in wasting in Indian surveys (NFHS-3, 4, RSOC & CNNS). *PLOS ONE*. 2021 Nov 22;16(11):e0260301.

56. Dimitrova A, Bora JK. Monsoon weather and early childhood health in India. *PLOS ONE*. 2020 Apr 10;15(4):e0231479.
57. Iqbal M, Fatmi Z, Khan K, Jumani Y, Amjad N, Nafees A. Malnutrition and food insecurity in child labourers in Sindh, Pakistan: a cross-sectional study. *East Mediterr Health J*. 2020 Sep 1;26(9):1087–96.
58. Islam MM, Khan MN, Mondal MNI. Does parental migration have any impact on nutritional disorders among left-behind children in Bangladesh? *Public Health Nutr*. 2019 Jan;22(1):95–103.
59. Shankar Mishra P, Jamadar M, Tripathy A, Anand A. Understanding the Socio-Economic Vulnerability in Child Malnutrition Between Migrants and Non-Migrants Children (12–59 Months) in India: Evidence from a Cross-Sectional Study. *Child Ind Res*. 2022 Oct;15(5):1871–88.
60. Ravindranath D, Trani JF, Iannotti L. Nutrition among children of migrant construction workers in Ahmedabad, India. *Int J Equity Health*. 2019 Dec;18(1):143.
61. Lwin SWW, Geater AF. Ethnic Groups and Father's Job Influencing Nutritional Status of Children (0–30 months) from Myanmar Migrant Community in Southern Thailand. *J Racial and Ethnic Health Disparities*. 2019 Oct;6(5):944–52.
62. Jayatissa R, Wickramage K. What Effect Does International Migration Have on the Nutritional Status and Child Care Practices of Children Left Behind? *IJERPH*. 2016 Feb 15;13(2):218.
63. Kunwar R, Vajdic CM, Muscatello DJ. Parental international migration is not associated with improved health care seeking for common childhood illnesses and nutritional status of young children left-behind in Nepal. *Public Health*. 2020 Sep;186:137–43.
64. Lobo AS, Margaret B, Pothiyil TD. Prevalence of Malnutrition Among Under-Five Children in Migrant Population of Udupi District, Karnataka, India. *OJHAS*. 2018;17(4):1–4.
65. Mohan P, Agarwal K, Jain P. Child Malnutrition in Rajasthan. 2016;(33).
66. Prusty RK, Keshri K. Differentials in child nutrition and immunization among migrants and non-migrants in Urban India. *International Journal of Migration, Health and Social Care*. 2015 Sep 21;11(3):194–205.
67. Tatah L, Nkuzimana T, Foley L, de Brauw A, Rodriguez-Llanes JM. Resilience in maternal and child nutrition outcomes in a refugee-hosting community in Cameroon: A quasi-experimental study. *Heliyon*. 2022 Dec;8(12):e12096.
68. Massad S, Deckelbaum RJ, Gebre-Medhin M, Holleran S, Dary O, Obeidi M, et al. Double Burden of Undernutrition and Obesity in Palestinian Schoolchildren: A Cross-Sectional Study. *Food Nutr Bull*. 2016 Jun;37(2):144–52.
69. Nahalomo A, Iversen PO, Rukundo PM, Kaaya A, Kikafunda J, Eide WB, et al. Realization of the right to adequate food and the nutritional status of land evictees: a case for mothers/caregivers and their children in rural Central Uganda. *BMC Int Health Hum Rights*. 2018 Dec;18(1):21.

70. El Kishawi RR, Soo KL, Abed YA, Muda WAMW. Prevalence and associated factors influencing stunting in children aged 2–5 years in the Gaza Strip-Palestine: a cross-sectional study. *BMC Pediatr.* 2017 Dec;17(1):210.

WITHDRAWN  
see manuscript DOI for details

Table 1: Characteristics of the studies included in this review

| Author & Year of Publication             | Country/ WHO Regions          | Study Design            | Sampling Population                                                                                                    | Age (years) | Sample size                      | Undernutrition Outcomes (%)<br>(Stunting – S; Wasting – W; Underweight – U) | Quality Assessment |
|------------------------------------------|-------------------------------|-------------------------|------------------------------------------------------------------------------------------------------------------------|-------------|----------------------------------|-----------------------------------------------------------------------------|--------------------|
| Iqbal et al. (2020) <sup>57</sup>        | Pakistan/ EMR                 | Cross-sectional study   | Migrant child labourers working in informal sectors                                                                    | 5-14        | 200                              | S –9.0; W –35.0; U –NA                                                      | 87.5 (Good)        |
| Islam et al. (2018) <sup>58</sup>        | Bangladesh/ SEAR              | Secondary data analysis | Left behind children of either both or one of the parents who migrated                                                 | < 5         | 23402                            | S –42.2; W –9.9; U –32.4                                                    | 100 (Good)         |
| Mishra et al. (2022) <sup>59</sup>       | India/ SEAR                   | Secondary Data Analysis | Migrants Children belonging to diverse socioeconomic stratum                                                           | < 5         | 66,017                           | S –4.0; W – NA; U –32.8                                                     | 87.5 (Good)        |
| Ravindranath et al. (2019) <sup>60</sup> | India/ SEAR                   | Mixed methods Research  | Children of migrant construction workers                                                                               | < 5         | 131                              | S –40.5; W –22.1; U –50.4                                                   | 87.5 (Good)        |
| Graham et al. (2014) <sup>33</sup>       | Philippines and Vietnam/ SEAR | Cross-sectional study   | Left behind children of either both or one of the parents who migrated                                                 | 9-11        | Philippines - 237; Vietnam - 255 | S – (Philippines - 9.2) Vietnam - 16.0); W – NA; U – NA                     | 75 (Good)          |
| Lwin et al. (2019) <sup>61</sup>         | Myanmar                       | Cross-sectional study   | Migrant children belonging to households earning from fishery-related jobs                                             | ≤ 2.5       | 100                              | S –19.6; W –7.8; U –10.8                                                    | 62.5 (Fair)        |
| Jayatissa et al. (2016) <sup>62</sup>    | Sri Lanka                     | Cross-sectional study   | Left behind children of either both or one of the parents who migrated abroad (majority involved in low-skilled works) | < 5         | 321                              | S –8.0; W –6.0; U –23.0                                                     | 75 (Good)          |
| Dabar et al. (2020) <sup>38</sup>        | India                         | Cross-sectional study   | Children of migrantworkers in unorganized sectors.                                                                     | < 5         | 520                              | S –42.6; W – NA; U –34.0                                                    | 87.5 (Good)        |

|                                        |           |                               |                                                                                   |        |       |                           |             |
|----------------------------------------|-----------|-------------------------------|-----------------------------------------------------------------------------------|--------|-------|---------------------------|-------------|
| Roshania et al. (2022) <sup>36</sup>   | India     | Cross-sectional study         | Circular migrants Children belonging to households working in Brick kiln of Bihar | < 3    | 2564  | S –51.6; W –25.7; U – NA  | 100 (Good)  |
| Kunwar et al. (2020) <sup>63</sup>     | Nepal     | Cross-sectional study         | Left behind children of either both or one of the parents who migrated            | < 5    | 1248  | S –35.3; W –11.7; U –28.3 | 100 (Good)  |
| Lobo et al. (2018) <sup>64</sup>       | India     | Cross-sectional study         | Migrant children of Udupi District; belonging to Low-income households            | < 5    | 260   | S –67.6; W –19.6; U –48.8 | 87.5 (Good) |
| Mohan et al. (2016) <sup>65</sup>      | India     | Cross-sectional study         | Tribal migrant children of Salambar block in Udaipur district                     | < 3    | 695   | S –11.7; W –16.2; U –30.4 | 87.5 (Good) |
| Prusty et al. (2015) <sup>66</sup>     | India     | Secondary Data Analysis       | Migrant Children from households with standards of living judged as Low           | NA     | 13220 | S –58.5; W –23.7; U –53.3 | 87.5 (Good) |
| Tatah et al. (2022) <sup>67</sup>      | Cameroon  | Secondary data analysis       | Refugee children from conflicted areas of Central African Republic                | < 5    | 813   | S –15.5; W –2.1; U –11.4  | 100 (Good)  |
| Massad et al. (2016) <sup>68</sup>     | Palestine | Cross-sectional school survey | Palestine Refugees children                                                       | 5 - 16 | 1484  | S –7.0; W – NA; U –3.0    | 100 (Good)  |
| Nahalomo et al. (2018) <sup>69</sup>   | Uganda    | Cross-sectional study         | Migrated as land evictees                                                         | < 5    | 187   | S –34.2; W –9.6; U –18.2  | 87.5 (Good) |
| El Kishawi et al. (2017) <sup>70</sup> | Palestine | Cross-sectional study         | Preschool refugee children in the Gaza Strip                                      | 2 - 5  | 357   | S –19.6; W – NA; U – NA   | 100 (Good)  |

Table 2: Subgroup analysis and univariate meta -regression: Effect of studies conducted in different WHO Regions on select undernutrition indicators

| Subgroups based on WHO Region                                                                                                     | No. Of Studies (n)           | Pulled estimate | 95% CI        | Heterogeneity      |          | Meta-regression                 |          |                    |
|-----------------------------------------------------------------------------------------------------------------------------------|------------------------------|-----------------|---------------|--------------------|----------|---------------------------------|----------|--------------------|
|                                                                                                                                   |                              |                 |               | I <sup>2</sup> (%) | P- Value | p-value for Subgroup difference | P- Value | R <sup>2</sup> (%) |
| <b>Stunting among migrants/ refugee children belonging to lower economic stratum or with a low standard of living in LMICs</b>    |                              |                 |               |                    |          |                                 |          |                    |
| EMR*                                                                                                                              | 3                            | 11.11           | 4.75 – 19.70  | 96                 | <0.01    |                                 |          |                    |
| SEAR*                                                                                                                             | 11                           | 36.64           | 25.28 – 48.81 | 100                | <0.001   |                                 |          |                    |
| WPR*                                                                                                                              | 1<br>(Two subset population) | 12.51           | 6.64 – 19.90  | 81                 | 0.02     | <0.01                           | 0.02     | 26.88              |
| AFR*                                                                                                                              | 2                            | 24.04           | 8.54 – 44.30  | 97                 | <0.01    |                                 |          |                    |
| <b>Wasting among migrants/ refugee children belonging to lower economic stratum or with a low standard of living in LMICs</b>     |                              |                 |               |                    |          |                                 |          |                    |
| EMR                                                                                                                               | 1                            | 35.0            | 28.41 – 42.05 | --                 | --       |                                 |          |                    |
| SEAR                                                                                                                              | 9                            | 13.98           | 9.15 – 19.63  | 99                 | <0.01    | <0.01                           | 0.01     | 36.36              |
| AFR                                                                                                                               | 2                            | 5.08            | 0.36 – 14.74  | 94                 |          |                                 |          |                    |
| <b>Underweight among migrants/ refugee children belonging to lower economic stratum or with a low standard of living in LMICs</b> |                              |                 |               |                    |          |                                 |          |                    |
| EMR                                                                                                                               | 1                            | 3.30            | 2.45 – 4.34   | --                 | --       |                                 |          |                    |
| SEAR                                                                                                                              | 10                           | 31.79           | 22.64 – 41.71 | 100                | <0.001   | <0.01                           | 0.01     | 35.36              |
| AFR                                                                                                                               | 2                            | 14.27           | 8.42 – 21.35  | 82                 | 0.02     |                                 |          |                    |

\* EMR: Eastern Mediterranean; SEAR: South East Asia; WPR: Western Pacific; AFR: African Regions



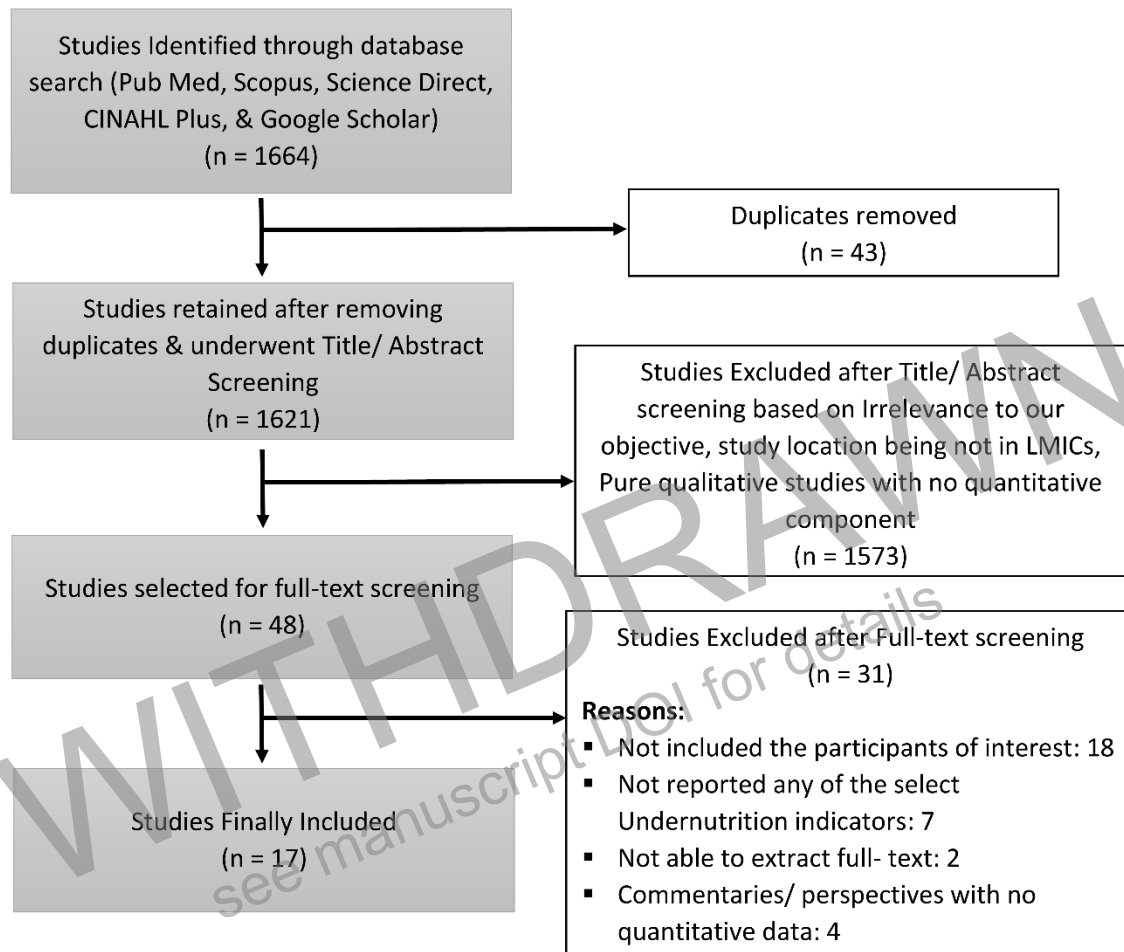

Figure 1: PRISMA Flowchart

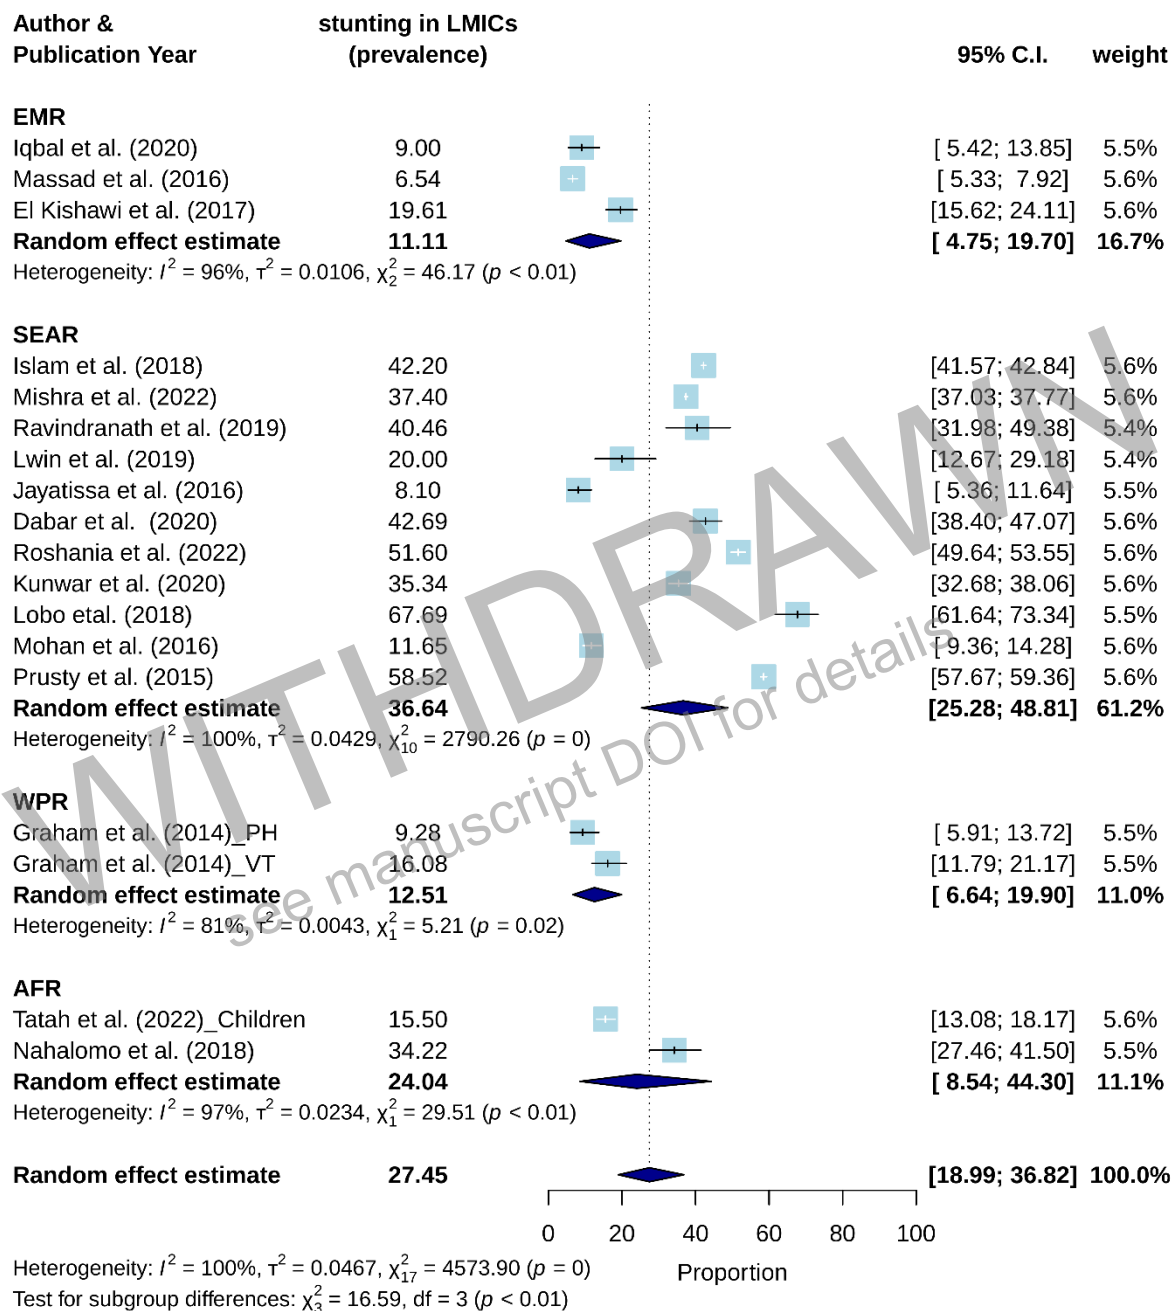

Figure 2: Forest Plot for Stunting estimates among migrant/ refugee children in LMICs

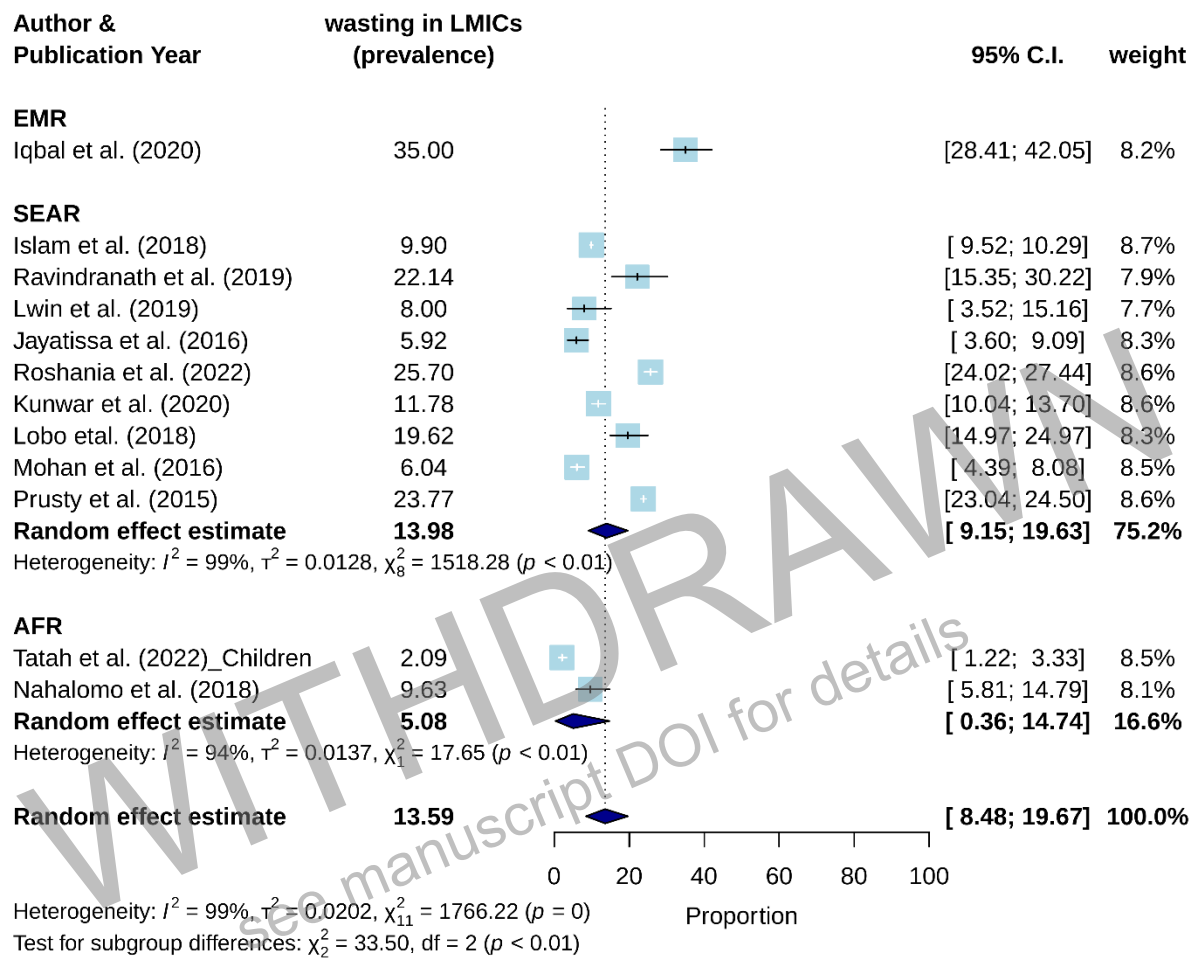

Figure 3: Forest Plot for Wasting estimates among migrant/ refugee children in LMICs

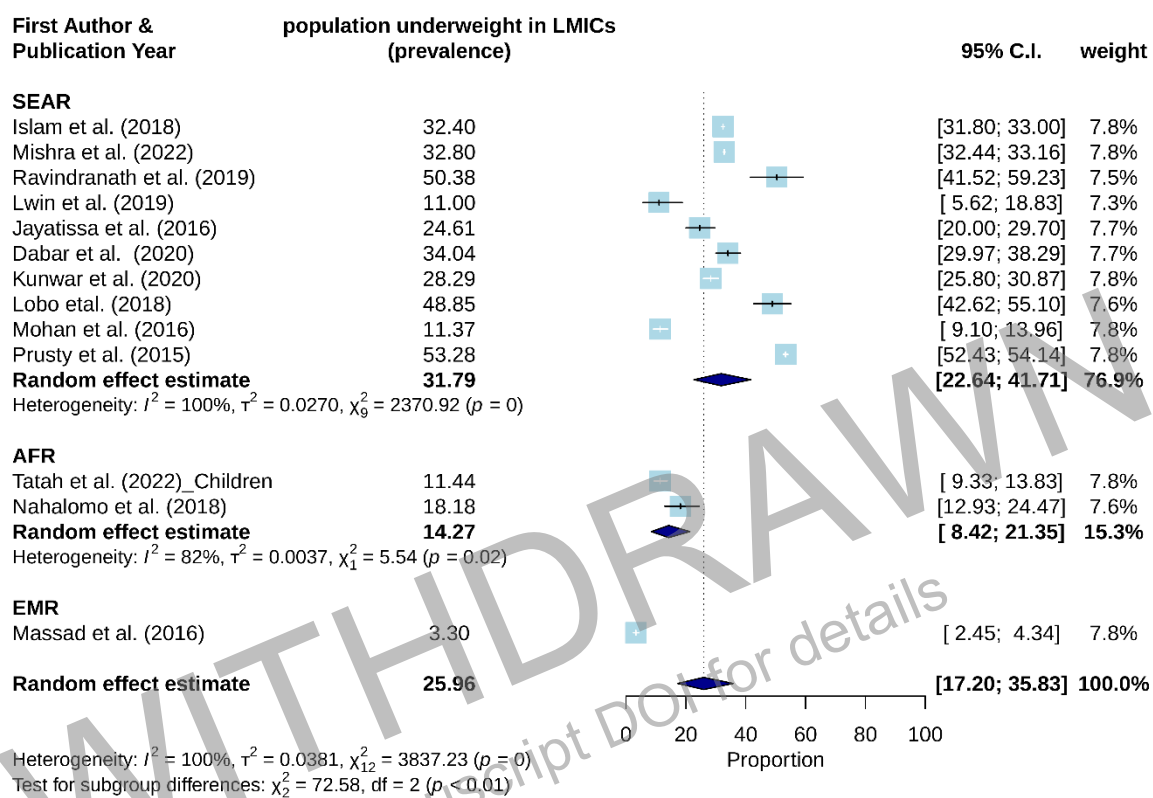

Figure 4: Forest Plot for Underweight estimates among migrant/ refugee children in LMICs
